# Supplementary material for: Ontology-based collection, representation and analysis of drug-associated neuropathy adverse events
Source: PubMed Central journal article supplement (PMC4875649; doi:10.1186/s13326-016-0069-x), 2016-05-21
Supplement: 13326_2016_69_MOESM1_ESM.pdf [file 13326_2016_69_MOESM1_ESM.pdf]

# Supplemental File 1:

## **SPARQL scripts developed for the ODNAE analyses used in the ODNAE manuscript:**

Note: Six sets of SPARQL scripts (20 individual scripts in total) were generated for the ODNAE study. All the four sets of SPARQL scripts were stored in the ODNAE Github folder:

<https://github.com/odnae/odnae/tree/master/docs/SPARQL>

The contents of these six sets of 20 SPARQL scripts are provided below:

The content of SPARQL File 1:

Title: **query\_G\_protein\_linked\_receptor\_interaction\_drugs**

Script:

- **1.1.** SPARQL query for searching the ODNAE drugs annotated with G-Protein-linked Receptor Interactions [MoA] (N0000000152) and its subclasses.

The content of SPARQL File 2:

Title: **query\_agonists\_antagonists**

- **2.1.** drugs link to agonist
- **2.2.** The agonist that links to ODNAE drugs
- **2.3.** drugs and agonist pair:
- **2.4.** drugs link to antagonist
- **2.5.** The antagonist that links to ODNAE drugs
- **2.6.** Antagonist and drugs pair
- **2.7.** drug link to both a kind of agonist and antagonist
- **2.8.** query drugs that have a specific role, e.g., Serotonin Agonists [MoA]. (used for Fig. 6)

The content of SPARQL File 3:

Title: **query\_all\_drug\_with\_MoAs**

- **3.1.** SPARQL query for searching all ODNAE drugs link to MoAs : subclassOf [http://purl.obolibrary.org/obo/ODNAE\\_0000002](http://purl.obolibrary.org/obo/ODNAE_0000002) (role in cellular and molecular interactions)

The content of SPARQL File 4:

Title: **query\_neurotransmitters\_interaction\_drugs**

- **4.1.** SPARQL query for searching the ODNAE drugs annotated with Neurotransmitter Transporter Interactions [MoA] (N0000000105) and its subclasses.
- **4.2.** # SPARQL query for searching the ODNAE drugs annotated with Dopamine Transporter Interactions [MoA] (N0000000219) and its subclasses.
- **4.3.** SPARQL query for searching the ODNAE drugs annotated with Norepinephrine Transporter Interactions [MoA] (N0000000234) and its subclasses.
- **4.4.** SPARQL query for searching the ODNAE drugs annotated with Serotonin Transporter Interactions [MoA] (N0000000167) and its subclasses.

The content of SPARQL File 5: (Note: The file to be generated)

Title: **link\_chemicals\_and\_drugs**

- **5.1.** identify the drugs having proper part of chemical elements

- 5.2. identify all ancestor CHEBI terms of CHEBI\_9667 (Triamcinolone)
- 5.3: get drugs for all child levels of a parent CHEBI term
- 5.4. Goal: get drugs for all levels of chebi terms --> #2 cleanup

SPARQL File 6: (Note: The file to be generated)

Title: link\_drugs\_Chebi\_AEs

- 6.1: This is to find drugs vs AEs that are associated with these drugs.
- 6.2: This is to find AE and related drugs for the AE.
- 6.3: This is to identify chebi chemical terms for a specific AE. (Note: This is the script used to generate data for heatmap.)

### **The Content of SPARQL file 1:**

Script file name: query\_G\_protein\_linked\_receptor\_interaction\_drugs

Content:

--

#### **# SPARQL 1.1**

# SPARQL query for searching the ODNAE drugs annotated with G-Protein-linked Receptor Interactions [MoA] (<<http://evs.nci.nih.gov/ftp1/NDF-RT/NDF-RT.owl#N0000000152>>) and its subclasses.

prefix rdf: <<http://www.w3.org/1999/02/22-rdf-syntax-ns#>>

prefix owl: <<http://www.w3.org/2002/07/owl#>>

prefix obo: <<http://purl.obolibrary.org/obo/>>

SELECT distinct ?s ?label

From <<http://purl.obolibrary.org/obo/merged/ODNAE>>

WHERE

{ ?s rdfs:subClassOf ?s1 .

?s rdfs:label ?label .

?s1 owl:onProperty obo:RO\_0000087; owl:someValuesFrom ?s2 .

?s2 rdfs:subClassOf <<http://evs.nci.nih.gov/ftp1/NDF-RT/NDF-RT.owl#N0000000152>> option (transitive).

}

#### **Notes:**

*To count the total number (instead of providing the list):*

- Change "distinct ?s ?label" TO: "count(distinct ?s)" in the script.

*Related terms used in the script:*

- [http://purl.obolibrary.org/obo/RO\\_0000087](http://purl.obolibrary.org/obo/RO_0000087) --> has role
- ODNAE: N0000000152: <http://evs.nci.nih.gov/ftp1/NDF-RT/NDF-RT.owl#N0000000152> : <http://www.ontobee.org/ontology/ODNAE?iri=http://evs.nci.nih.gov/ftp1/NDF-RT/NDF-RT.owl%23N0000000152> → G-Protein-linked Receptor Interactions [MoA]

# results: (run on <http://sparql.hegroup.org/sparql/>, at 8:40 CST 4/30/2015 by Asiyah Yu Lin)

20

s label

|                                                                                                         |                        |
|---------------------------------------------------------------------------------------------------------|------------------------|
| <a href="http://purl.obolibrary.org/obo/DRON_00020516">http://purl.obolibrary.org/obo/DRON_00020516</a> | Amantadine Oral Tablet |
| <a href="http://purl.obolibrary.org/obo/DRON_00022309">http://purl.obolibrary.org/obo/DRON_00022309</a> | Losartan Oral Tablet   |
| .....                                                                                                   |                        |
| <a href="http://purl.obolibrary.org/obo/DRON_00020955">http://purl.obolibrary.org/obo/DRON_00020955</a> | Betaxolol Oral Tablet  |
| --                                                                                                      |                        |

## **The Content of SPARQL File 2:**

Script file name: **query\_agonists\_antagonists**

Content:

--

**# SPARQL query for searching the ODNAE drugs are agonists and antagonists**

### **# SPARQL 2.1. drugs link to agonist**

```

prefix rdf: <http://www.w3.org/1999/02/22-rdf-syntax-ns#>
prefix owl: <http://www.w3.org/2002/07/owl#>
prefix obo: <http://purl.obolibrary.org/obo/>
SELECT distinct ?s ?label
From <http://purl.obolibrary.org/obo/merged/ODNAE>
WHERE
{ ?s rdfs:subClassOf ?s1 .
  ?s rdfs:label ?label .
  ?s1 owl:onProperty obo:RO_0000087; owl:someValuesFrom ?s2 .
  ?s2 rdfs:subClassOf <http://purl.obolibrary.org/obo/ODNAE_0000002> option (transitive).
  ?s2 rdfs:label ?label2 .
  FILTER REGEX(str(?label2), "Agonist")
}

```

# results in total 17 drugs: (run on <http://sparql.hegroup.org/sparql/>, at 9:56 CST 4/30/2015 by Asiyah Yu Lin)

|                                                                                                         |       |                           |
|---------------------------------------------------------------------------------------------------------|-------|---------------------------|
| s                                                                                                       | label |                           |
| <a href="http://purl.obolibrary.org/obo/DRON_00013678">http://purl.obolibrary.org/obo/DRON_00013678</a> |       | cevimeline                |
| <a href="http://purl.obolibrary.org/obo/DRON_00022889">http://purl.obolibrary.org/obo/DRON_00022889</a> |       | Pergolide Oral Tablet     |
| .....                                                                                                   |       |                           |
| <a href="http://purl.obolibrary.org/obo/DRON_00022385">http://purl.obolibrary.org/obo/DRON_00022385</a> |       | Megestrol Oral Suspension |

### **# SPARQL 2.2. The agnoist that links to ODNAE drugs**

```

prefix rdf: <http://www.w3.org/1999/02/22-rdf-syntax-ns#>
prefix owl: <http://www.w3.org/2002/07/owl#>
prefix obo: <http://purl.obolibrary.org/obo/>
SELECT distinct ?s2 ?label2
From <http://purl.obolibrary.org/obo/merged/ODNAE>
WHERE
{ ?s rdfs:subClassOf ?s1 .

```

```

?s rdfs:label ?label .
?s1 owl:onProperty obo:RO_0000087; owl:someValuesFrom ?s2 .
?s2 rdfs:subClassOf <http://purl.obolibrary.org/obo/ODNAE_0000002> option (transitive).
?s2 rdfs:label ?label2 .
FILTER REGEX(str(?label2), "Agonist")
}

```

# results in total 9 agonists: (run on <http://sparql.hegroup.org/sparql/>, at 9:14 CST 4/30/2015 by Asiyah Yu Lin)

```

s2      label2
http://evs.nci.nih.gov/ftp1/NDF-RT/NDF-RT.owl#N0000000104  Cholinergic Muscarinic Agonists [MoA]
http://evs.nci.nih.gov/ftp1/NDF-RT/NDF-RT.owl#N0000000117  Dopamine Agonists [MoA]
.....
http://evs.nci.nih.gov/ftp1/NDF-RT/NDF-RT.owl#N0000000185  Progestational Hormone Receptor
Agonists [MoA]

```

### # SPARQL 2.3. drugs and agonist pair:

```

prefix rdf: <http://www.w3.org/1999/02/22-rdf-syntax-ns#>
prefix owl: <http://www.w3.org/2002/07/owl#>
prefix obo: <http://purl.obolibrary.org/obo/>
SELECT distinct ?label ?label2
From <http://purl.obolibrary.org/obo/merged/ODNAE>
WHERE
{ ?s rdfs:subClassOf ?s1 .
  ?s rdfs:label ?label .
  ?s1 owl:onProperty obo:RO_0000087; owl:someValuesFrom ?s2 .
  ?s2 rdfs:subClassOf <http://purl.obolibrary.org/obo/ODNAE_0000002> option (transitive).
  ?s2 rdfs:label ?label2 .
  FILTER REGEX(str(?label2), "Agonist")
}

```

# results in 17 drugs and agonist pair: (run on <http://sparql.hegroup.org/sparql/>, at 10:28 CST 4/30/2015 by Asiyah Yu Lin)

```

label      label2
cevimeline  Cholinergic Muscarinic Agonists [MoA]
Pergolide Oral Tablet  Dopamine Agonists [MoA]
.....
Megestrol Oral Suspension  Progestational Hormone Receptor Agonists [MoA]

```

### # SPARQL 2.4. drugs link to antagonist

```

prefix rdf: <http://www.w3.org/1999/02/22-rdf-syntax-ns#>
prefix owl: <http://www.w3.org/2002/07/owl#>

```

```

prefix obo: <http://purl.obolibrary.org/obo/>
SELECT distinct ?s ?label
From <http://purl.obolibrary.org/obo/merged/ODNAE>
WHERE
{ ?s rdfs:subClassOf ?s1 .
  ?s rdfs:label ?label .
  ?s1 owl:onProperty obo:RO_0000087; owl:someValuesFrom ?s2 .
  ?s2 rdfs:subClassOf <http://purl.obolibrary.org/obo/ODNAE_0000002> option (transitive).
  ?s2 rdfs:label ?label2 .
  FILTER REGEX(str(?label2), "Antagonist")
}

```

# results in total 16 drugs: (run on <http://sparql.hegroup.org/sparql/>, at 10:00 CST 4/30/2015 by Asiyah Yu Lin)

```

s      label
http://purl.obolibrary.org/obo/DRON_00022309      Losartan Oral Tablet
http://purl.obolibrary.org/obo/DRON_00020523      Amiodarone Oral Tablet
.....
http://purl.obolibrary.org/obo/DRON_00020960      bicalutamide Oral Tablet

```

### # SPARQL 2.5. The antagonist that links to ODNAE drugs

```

prefix rdf: <http://www.w3.org/1999/02/22-rdf-syntax-ns#>
prefix owl: <http://www.w3.org/2002/07/owl#>
prefix obo: <http://purl.obolibrary.org/obo/>
SELECT distinct ?s2 ?label2
From <http://purl.obolibrary.org/obo/merged/ODNAE>
WHERE
{ ?s rdfs:subClassOf ?s1 .
  ?s rdfs:label ?label .
  ?s1 owl:onProperty obo:RO_0000087; owl:someValuesFrom ?s2 .
  ?s2 rdfs:subClassOf <http://purl.obolibrary.org/obo/ODNAE_0000002> option (transitive).
  ?s2 rdfs:label ?label2 .
  FILTER REGEX(str(?label2), "Antagonist")
}

```

# results in total 17 antagonist: (run on <http://sparql.hegroup.org/sparql/>, at 10:01 CST 4/30/2015 by Asiyah Yu Lin)

```

s2      label2
http://evs.nci.nih.gov/ftp1/NDF-RT/NDF-RT.owl#N0000000070      Angiotensin 2 Receptor Antagonists
[MoA]
http://evs.nci.nih.gov/ftp1/NDF-RT/NDF-RT.owl#N0000000069      Calcium Channel Antagonists [MoA]
.....
http://evs.nci.nih.gov/ftp1/NDF-RT/NDF-RT.owl#N0000000243      Androgen Receptor Antagonists [MoA]

```

## # SPARQL 2.6. Antagonist and drugs pair

```
prefix rdf: <http://www.w3.org/1999/02/22-rdf-syntax-ns#>
prefix owl: <http://www.w3.org/2002/07/owl#>
prefix obo: <http://purl.obolibrary.org/obo/>
SELECT distinct ?label ?label2
From <http://purl.obolibrary.org/obo/merged/ODNAE>
WHERE
{ ?s rdfs:subClassOf ?s1 .
  ?s rdfs:label ?label .
  ?s1 owl:onProperty obo:RO_0000087; owl:someValuesFrom ?s2 .
  ?s2 rdfs:subClassOf <http://purl.obolibrary.org/obo/ODNAE_0000002> option (transitive).
  ?s2 rdfs:label ?label2 .
  FILTER REGEX(str(?label2), "Antagonist")
}
```

# results in 21 drugs and agonist pair: (run on <http://sparql.hegroup.org/sparql/>, at 10:28 CST 4/30/2015 by Asiyah Yu Lin)

```
label    label2
Losartan Oral Tablet    Angiotensin 2 Receptor Antagonists [MoA]
Amiodarone Oral Tablet    Calcium Channel Antagonists [MoA]
.....
bicalutamide Oral Tablet    Androgen Receptor Antagonists [MoA]
```

## # SPARQL 2.7. drug link to both a kind of agonist and antagonist

```
prefix rdf: <http://www.w3.org/1999/02/22-rdf-syntax-ns#>
prefix owl: <http://www.w3.org/2002/07/owl#>
prefix obo: <http://purl.obolibrary.org/obo/>
SELECT distinct ?s ?label ?label2 ?label4
From <http://purl.obolibrary.org/obo/merged/ODNAE>
WHERE
{ ?s rdfs:subClassOf ?s1 .
  ?s rdfs:label ?label .

  ?s1 owl:onProperty obo:RO_0000087; owl:someValuesFrom ?s2 .
  ?s2 rdfs:subClassOf <http://purl.obolibrary.org/obo/ODNAE_0000002> option (transitive).
  ?s2 rdfs:label ?label2 .
  FILTER REGEX(str(?label2), "Agonist")

  ?s rdfs:subClassOf ?s3 .
  ?s3 owl:onProperty obo:RO_0000087; owl:someValuesFrom ?s4 .
  ?s4 rdfs:subClassOf <http://purl.obolibrary.org/obo/ODNAE_0000002> option (transitive).
  ?s4 rdfs:label ?label4 .
  FILTER REGEX(str(?label4), "Antagonist")
}
```

# results in 1 drug : (run on <http://sparql.hegroup.org/sparql/>, at 12:10 CST 4/30/2015 by Asiyah Yu Lin)  
--

**# SPARQL 2.8.** query drugs that have a specific role, e.g., Serotonin Agonists [MoA] (N0000000256).

# Note: This is the SPARQL script for Figure 6.

# Goal: Find drugs that has role (RO\_0000087) of Serotonin Agonists [MoA] (N0000000256) from ODNAE

```
prefix owl: <http://www.w3.org/2002/07/owl#>
prefix obo: <http://purl.obolibrary.org/obo/>
prefix ndfrt: <http://evs.nci.nih.gov/ftp1/NDF-RT/NDF-RT.owl#>
```

```
SELECT distinct ?drug ?drug_label
FROM <http://purl.obolibrary.org/obo/merged/ODNAE>
WHERE {
  ?drug rdfs:subClassOf ?bnode .
  ?drug rdfs:label ?drug_label .
  ?bnode owl:onProperty obo:RO_0000087; owl:someValuesFrom ndfrt:N0000000256 .
}
```

### **The Content of SPARQL File 3:**

Script file name: **query\_all\_drug\_with\_MoAs**

Content:

--

**# SPARQL 3.1.** SPARQL query for searching all ODNAE drugs link to MoAs : subClassOf [http://purl.obolibrary.org/obo/ODNAE\\_0000002](http://purl.obolibrary.org/obo/ODNAE_0000002) (role in cellular and molecular interactions)

```
prefix rdf: <http://www.w3.org/1999/02/22-rdf-syntax-ns#>
prefix owl: <http://www.w3.org/2002/07/owl#>
prefix obo: <http://purl.obolibrary.org/obo/>
SELECT distinct ?s ?label
From <http://purl.obolibrary.org/obo/merged/ODNAE>
WHERE
{ ?s rdfs:subClassOf ?s1 .
  ?s rdfs:label ?label .
  ?s1 owl:onProperty obo:RO_0000087; owl:someValuesFrom ?s2 .
  ?s2 rdfs:subClassOf <http://purl.obolibrary.org/obo/ODNAE_0000002> option (transitive).
}
```

# results in total 162 drugs: (run on <http://sparql.hegroup.org/sparql/>, at 10:03 CST 4/30/2015 by Asiyah Yu Lin)

```
s      label
http://purl.obolibrary.org/obo/DRON_00020539      anastrozole Oral Tablet
http://purl.obolibrary.org/obo/DRON_00022714      Nitrofurantoin Oral Tablet
.....
http://purl.obolibrary.org/obo/DRON_00020960      bicalutamide Oral Tablet
```

--

## **The Content of SPARQL 4:**

Script file name: **query\_neurotransmitters\_interaction\_drugs**

Content:

--

**# SPARQL 4.1.** SPARQL query for searching the ODNAE drugs annotated with Neurotransmitter Transporter Interactions [MoA] (<<http://evs.nci.nih.gov/ftp1/NDF-RT/NDF-RT.owl#N0000000105>>) and its subclasses.

```
prefix rdf: <http://www.w3.org/1999/02/22-rdf-syntax-ns#>
prefix owl: <http://www.w3.org/2002/07/owl#>
prefix obo: <http://purl.obolibrary.org/obo/>
SELECT distinct ?s ?label
From <http://purl.obolibrary.org/obo/merged/ODNAE>
WHERE
{ ?s rdfs:subClassOf ?s1 .
  ?s rdfs:label ?label .
  ?s1 owl:onProperty obo:RO_0000087; owl:someValuesFrom ?s2 .
  ?s2 rdfs:subClassOf <http://evs.nci.nih.gov/ftp1/NDF-RT/NDF-RT.owl#N0000000105> option
(transitive).
}
```

# results in total 12 drugs: (run on <http://sparql.hegroup.org/sparql/>, at 8:56 CST 4/30/2015 by Asiyah Yu Lin)

|                                                                                                         |       |                           |
|---------------------------------------------------------------------------------------------------------|-------|---------------------------|
| s                                                                                                       | label |                           |
| <a href="http://purl.obolibrary.org/obo/DRON_00026665">http://purl.obolibrary.org/obo/DRON_00026665</a> |       | Bupropion Oral Tablet     |
| <a href="http://purl.obolibrary.org/obo/DRON_00020525">http://purl.obolibrary.org/obo/DRON_00020525</a> |       | Amitriptyline Oral Tablet |
| .....                                                                                                   |       |                           |
| <a href="http://purl.obolibrary.org/obo/DRON_00027059">http://purl.obolibrary.org/obo/DRON_00027059</a> |       | Paroxetine Oral Tablet    |

**# SPARQL 4.2.** # SPARQL query for searching the ODNAE drugs annotated with Dopamine Transporter Interactions [MoA] (<<http://evs.nci.nih.gov/ftp1/NDF-RT/NDF-RT.owl#N0000000219>>) and its subclasses.

```
prefix rdf: <http://www.w3.org/1999/02/22-rdf-syntax-ns#>
prefix owl: <http://www.w3.org/2002/07/owl#>
prefix obo: <http://purl.obolibrary.org/obo/>
SELECT distinct ?s ?label
From <http://purl.obolibrary.org/obo/merged/ODNAE>
WHERE
{ ?s rdfs:subClassOf ?s1 .
  ?s rdfs:label ?label .
  ?s1 owl:onProperty obo:RO_0000087; owl:someValuesFrom ?s2 .
```



```
?s2 rdfs:subClassOf <http://evs.nci.nih.gov/ftp1/NDF-RT/NDF-RT.owl#N0000000219> option
(transitive).
}
```

# results in total 1 drug: (run on <http://sparql.hegroup.org/sparql/>, at 8:59 CST 4/30/2015 by Asiyah Yu Lin)

```
s      label
http://purl.obolibrary.org/obo/DRON_00026665      Bupropion Oral Tablet
```

**# SPARQL 4.3.** SPARQL query for searching the ODNAE drugs annotated with Norepinephrine Transporter Interactions [MoA] (<<http://evs.nci.nih.gov/ftp1/NDF-RT/NDF-RT.owl#N0000000234>>) and its subclasses.

```
prefix rdf: <http://www.w3.org/1999/02/22-rdf-syntax-ns#>
prefix owl: <http://www.w3.org/2002/07/owl#>
prefix obo: <http://purl.obolibrary.org/obo/>
SELECT distinct ?s ?label
From <http://purl.obolibrary.org/obo/merged/ODNAE>
WHERE
{ ?s rdfs:subClassOf ?s1 .
  ?s rdfs:label ?label .
  ?s1 owl:onProperty obo:RO_0000087; owl:someValuesFrom ?s2 .
  ?s2 rdfs:subClassOf <http://evs.nci.nih.gov/ftp1/NDF-RT/NDF-RT.owl#N0000000234> option
(transitive).
}
```

# results in total 10 drug: (run on <http://sparql.hegroup.org/sparql/>, at 8:59 CST 4/30/2015 by Asiyah Yu Lin)

```
s      label
http://purl.obolibrary.org/obo/DRON_00020525      Amitriptyline Oral Tablet
http://purl.obolibrary.org/obo/DRON_00020620      Imipramine Oral Tablet
.....
http://purl.obolibrary.org/obo/DRON_00026665      Bupropion Oral Tablet
```

**# SPARQL 4.4.** SPARQL query for searching the ODNAE drugs annotated with Serotonin Transporter Interactions [MoA] (<<http://evs.nci.nih.gov/ftp1/NDF-RT/NDF-RT.owl#N0000000167>>) and its subclasses.

```
prefix rdf: <http://www.w3.org/1999/02/22-rdf-syntax-ns#>
prefix owl: <http://www.w3.org/2002/07/owl#>
prefix obo: <http://purl.obolibrary.org/obo/>
SELECT distinct ?s ?label
From <http://purl.obolibrary.org/obo/merged/ODNAE>
WHERE
{ ?s rdfs:subClassOf ?s1 .
```

```

?s rdfs:label ?label .
?s1 owl:onProperty obo:RO_0000087; owl:someValuesFrom ?s2 .
?s2 rdfs:subClassOf <http://evs.nci.nih.gov/ftp1/NDF-RT/NDF-RT.owl#N0000000167> option
(transitive).
}

```

# results in total 11 drug: (run on <http://sparql.hegroup.org/sparql/>, at 9:05 CST 4/30/2015 by Asiyah Yu Lin)

```

s      label
http://purl.obolibrary.org/obo/DRON_00020525      Amitriptyline Oral Tablet
http://purl.obolibrary.org/obo/DRON_00020620      Imipramine Oral Tablet
.....
http://purl.obolibrary.org/obo/DRON_00027059      Paroxetine Oral Tablet

```

--

### **The Content of SPARQL File 5:**

Script file name: **query\_chemicals\_and\_drugs**

Content:

--

**# SPARQL 5.1. identify the drugs having proper part of chemical elements**

# Note: [http://www.obofoundry.org/ro/ro.owl#has\\_proper\\_part](http://www.obofoundry.org/ro/ro.owl#has_proper_part)

prefix rdf: <<http://www.w3.org/1999/02/22-rdf-syntax-ns#>>

prefix owl: <<http://www.w3.org/2002/07/owl#>>

prefix obo: <<http://purl.obolibrary.org/obo/>>

```

SELECT ?d ?label1 ?c ?label2
FROM <http://purl.obolibrary.org/obo/merged/ODNAE>
WHERE {
  ?d rdfs:subClassOf ?s1 .
  ?d rdfs:label ?label1 .
  ?s1 owl:onProperty <http://www.obofoundry.org/ro/ro.owl#has_proper_part>;
  owl:someValuesFrom ?c .
  ?c rdfs:label ?label2 .
}

```

#Results:

#count (distinct ?d) → 213

Example:

| d                                                                                                       | label1                            | c                                                                                                   | label2        |
|---------------------------------------------------------------------------------------------------------|-----------------------------------|-----------------------------------------------------------------------------------------------------|---------------|
| <a href="http://purl.obolibrary.org/obo/DRON_00020336">http://purl.obolibrary.org/obo/DRON_00020336</a> | Triamcinolone Oral Tablet         | <a href="http://purl.obolibrary.org/obo/CHEBI_9667">http://purl.obolibrary.org/obo/CHEBI_9667</a>   | Triamcinolone |
| <a href="http://purl.obolibrary.org/obo/DRON_00020337">http://purl.obolibrary.org/obo/DRON_00020337</a> | Dexamethasone Ophthalmic Ointment | <a href="http://purl.obolibrary.org/obo/CHEBI_41879">http://purl.obolibrary.org/obo/CHEBI_41879</a> | dexamethasone |

--

**# SPARQL 5.2. identify all ancestor CHEBI terms of CHEBI\_9667 (Triamcinolone)**

prefix rdf: <http://www.w3.org/1999/02/22-rdf-syntax-ns#>  
prefix owl: <http://www.w3.org/2002/07/owl#>  
prefix obo: <http://purl.obolibrary.org/obo/>

```
SELECT distinct ?label_9667 ?s ?label
FROM <http://purl.obolibrary.org/obo/merged/ODNAE>
WHERE {
<http://purl.obolibrary.org/obo/CHEBI_9667> rdfs:label ?label_9667 .
<http://purl.obolibrary.org/obo/CHEBI_9667> rdfs:subClassOf ?s option (transitive) .
?s rdfs:label ?label .
FILTER REGEX(str(?s), "CHEBI") .
}
```

# result  
13

```
label_9667    s        label
Triamcinolone http://purl.obolibrary.org/obo/CHEBI_50830  fluorinated steroid
Triamcinolone http://purl.obolibrary.org/obo/CHEBI_35341  steroid
...
```

**# SPARQL 5.3: get drugs for all child levels of a parent CHEBI term:**

# CHEBI\_22507: glycoside antibiotic

prefix rdf: <http://www.w3.org/1999/02/22-rdf-syntax-ns#>  
prefix owl: <http://www.w3.org/2002/07/owl#>  
prefix obo: <http://purl.obolibrary.org/obo/>

```
SELECT distinct ?s ?d ?d2 ?label2
FROM <http://purl.obolibrary.org/obo/merged/ODNAE>
WHERE {
?s rdfs:subClassOf <http://purl.obolibrary.org/obo/CHEBI_22507> option (transitive) .
?d owl:onProperty <http://www.obofoundry.org/ro/ro.owl#has_proper_part>; owl:someValuesFrom ?s .

?d2 rdfs:subClassOf ?d .
?d2 rdfs:label ?label2 .
}
```

# results: 2

| s                                          | d                   | d2                                           | label2                                       |
|--------------------------------------------|---------------------|----------------------------------------------|----------------------------------------------|
| http://purl.obolibrary.org/obo/CHEBI_17833 | nodeID://b339944739 | http://purl.obolibrary.org/obo/DRON_00022009 | Gentamicin Sulfate (USP) Injectable Solution |
| http://purl.obolibrary.org/obo/CHEBI_17076 | nodeID://b339944979 | http://purl.obolibrary.org/obo/DRON_00030017 | Streptomycin Oral Capsule                    |

--

**# SPARQL 5.4. Goal: get drugs for all levels of chebi terms --> #2 cleanup**

# CHEBI\_33582: carbon group molecular entities

prefix rdf: <http://www.w3.org/1999/02/22-rdf-syntax-ns#>

prefix owl: <http://www.w3.org/2002/07/owl#>

prefix obo: <http://purl.obolibrary.org/obo/>

SELECT distinct

<http://purl.obolibrary.org/obo/CHEBI\_33582> ?label\_targetchebi ?chebi\_for\_drug ?drug ?labeldrug

FROM <http://purl.obolibrary.org/obo/merged/ODNAE>

WHERE {

<http://purl.obolibrary.org/obo/CHEBI\_33582> rdfs:label ?label\_targetchebi .

?chebi\_for\_drug rdfs:subClassOf <http://purl.obolibrary.org/obo/CHEBI\_33582> option (transitive) .

?d owl:onProperty <http://www.obofoundry.org/ro/ro.owl#has\_proper\_part>;

owl:someValuesFrom ?chebi\_for\_drug .

?drug rdfs:subClassOf ?d .

?drug rdfs:label ?labeldrug .

}

#part of results:

| callret-0                                  | label_targetchebi             | chebi_for_drug                              | drug                                         | labeldrug                      |
|--------------------------------------------|-------------------------------|---------------------------------------------|----------------------------------------------|--------------------------------|
| http://purl.obolibrary.org/obo/CHEBI_33582 | carbon group molecular entity | http://purl.obolibrary.org/obo/CHEBI_63581  | http://purl.obolibrary.org/obo/DRON_00023447 | Stavudine Oral Capsule         |
| http://purl.obolibrary.org/obo/CHEBI_33582 | carbon group molecular entity | http://purl.obolibrary.org/obo/CHEBI_127780 | http://purl.obolibrary.org/obo/DRON_00025587 | Foscarnet Injectable Solution  |
| http://purl.obolibrary.org/obo/CHEBI_33582 | carbon group molecular entity | http://purl.obolibrary.org/obo/CHEBI_44915  | http://purl.obolibrary.org/obo/DRON_00026059 | Propofol Injectable Suspension |

Note: removed this line: ?chebi\_for\_drug rdfs:label ?label\_chebi .

Why: because the label\_chebi can have duplicate names for the same chebi.

## **The Content of SPARQL 6:**

Script file name: **link\_drugs\_Chebi\_AEs**

Content:

--

**# SPARQL 6.1: This is to find drugs vs AEs that are associated with these drugs.**

# BFO\_0000057: has\_participant

prefix rdf: <http://www.w3.org/1999/02/22-rdf-syntax-ns#>

prefix owl: <http://www.w3.org/2002/07/owl#>

prefix obo: <http://purl.obolibrary.org/obo/>

```

SELECT ?p_dae ?labelp ?dae ?label1 ?drug ?labeldrug ?s1
FROM <http://purl.obolibrary.org/obo/merged/ODNAE>
WHERE {
  ?dae rdfs:subClassOf ?s1 .

  ?dae rdfs:subClassOf ?p_dae .
  ?p_dae a owl:Class .
  ?p_dae rdfs:label ?labelp .

  ?dae rdfs:label ?label1 .
  ?s1 owl:onProperty obo:BFO_0000057; owl:someValuesFrom ?drug .
  ?drug rdfs:label ?labeldrug .

FILTER REGEX(str(?p_dae), "OAE") .
}

```

#part of results:

| p_dae                                                                                               | labelp                   | dae                                                                                                     | label1                                                                                     | drug                                                                                                    | labeldrug                                       | s1                  |
|-----------------------------------------------------------------------------------------------------|--------------------------|---------------------------------------------------------------------------------------------------------|--------------------------------------------------------------------------------------------|---------------------------------------------------------------------------------------------------------|-------------------------------------------------|---------------------|
| <a href="http://purl.obolibrary.org/obo/OAE_0000337">http://purl.obolibrary.org/obo/OAE_0000337</a> | peripheral neuropathy AE | <a href="http://purl.obolibrary.org/obo/ODNAE_0000023">http://purl.obolibrary.org/obo/ODNAE_0000023</a> | ciprofloxacin hydrochloride (Ciloxan, Cipro, Cetraxal)-associated peripheral neuropathy AE | <a href="http://purl.obolibrary.org/obo/DRON_00021347">http://purl.obolibrary.org/obo/DRON_00021347</a> | Ciprofloxacin Oral Tablet                       | nodeID://b339945066 |
| <a href="http://purl.obolibrary.org/obo/OAE_0001215">http://purl.obolibrary.org/obo/OAE_0001215</a> | neurotoxicity AE         | <a href="http://purl.obolibrary.org/obo/ODNAE_0000024">http://purl.obolibrary.org/obo/ODNAE_0000024</a> | cefepime (Maxipime)-associated neurotoxicity AE                                            | <a href="http://purl.obolibrary.org/obo/DRON_00024830">http://purl.obolibrary.org/obo/DRON_00024830</a> | cefepime Injectable Solution                    | nodeID://b339945067 |
| <a href="http://purl.obolibrary.org/obo/OAE_0000418">http://purl.obolibrary.org/obo/OAE_0000418</a> | neuropathy AE            | <a href="http://purl.obolibrary.org/obo/ODNAE_0000025">http://purl.obolibrary.org/obo/ODNAE_0000025</a> | penicillin G benzathine (Bicillin L-A)-associated neuropathy AE                            | <a href="http://purl.obolibrary.org/obo/DRON_00034441">http://purl.obolibrary.org/obo/DRON_00034441</a> | penicillin G benzathine 115 MG/ML Oral Solution | nodeID://b339945068 |

--

**# SPARQL 6.2: This is to find AE and related drugs for the AE.**

#Note: an AE (e.g., ciprofloxacin hydrochloride (Ciloxan, Cipro, Cetraxal)-associated peripheral neuropathy AE or ODNAE\_0000023) may have two superclasses, e.g., peripheral neuropathy AE, and drug-associated peripheral neuropathy adverse event. And this AE 'has participant' some 'Ciprofloxacin Oral Tablet'.

```

prefix rdf: <http://www.w3.org/1999/02/22-rdf-syntax-ns#>
prefix owl: <http://www.w3.org/2002/07/owl#>
prefix obo: <http://purl.obolibrary.org/obo/>

```

```

SELECT ?p ?labelp ?d ?label1 ?c ?label2 ?s1
FROM <http://purl.obolibrary.org/obo/merged/ODNAE>
WHERE {
  ?d rdfs:subClassOf ?s1 .
  ?d rdfs:subClassOf ?p .

```

```

?p a owl:Class .
?p rdfs:label ?labelp .

?d rdfs:label ?label1 .
?s1 owl:onProperty obo:BFO_0000057; owl:someValuesFrom ?c .
?c rdfs:label ?label2 .

FILTER REGEX(str(?p), "OAE") .
}

```

#part of results:

| p                                          | labelp                   | d                                            | label1                                                                                     | c                                            | label2                                          | s1                  |
|--------------------------------------------|--------------------------|----------------------------------------------|--------------------------------------------------------------------------------------------|----------------------------------------------|-------------------------------------------------|---------------------|
| http://purl.obolibrary.org/obo/OAE_0000337 | peripheral neuropathy AE | http://purl.obolibrary.org/obo/ODNAE_0000023 | ciprofloxacin hydrochloride (Ciloxan, Cipro, Cetraxal)-associated peripheral neuropathy AE | http://purl.obolibrary.org/obo/DRON_00021347 | Ciprofloxacin Oral Tablet                       | nodeID://b339945066 |
| http://purl.obolibrary.org/obo/OAE_0001215 | neurotoxicity AE         | http://purl.obolibrary.org/obo/ODNAE_0000024 | cefepime (Maxipime)-associated neurotoxicity AE                                            | http://purl.obolibrary.org/obo/DRON_00024830 | cefepime Injectable Solution                    | nodeID://b339945067 |
| http://purl.obolibrary.org/obo/OAE_0000418 | neuropathy AE            | http://purl.obolibrary.org/obo/ODNAE_0000025 | penicillin G benzathine (Bicillin L-A)-associated neuropathy AE                            | http://purl.obolibrary.org/obo/DRON_00034441 | penicillin G benzathine 115 MG/ML Oral Solution | nodeID://b339945068 |

**# SPARQL 6.3:** This is to identify chebi chemical terms for a specific AE.

**#Note:** Basically, this is to merge the above two scripts to map Chebi terms directly AE terms.

**#Note:** This is the script used to generate data for heatmap.

```

prefix rdf: <http://www.w3.org/1999/02/22-rdf-syntax-ns#>
prefix owl: <http://www.w3.org/2002/07/owl#>
prefix obo: <http://purl.obolibrary.org/obo/>

SELECT distinct
<http://purl.obolibrary.org/obo/CHEBI_33582> ?label_targetchebi ?chebi_for_drug ?drug ?labeldrug ?p
?labelp
FROM <http://purl.obolibrary.org/obo/merged/ODNAE>
WHERE {
  <http://purl.obolibrary.org/obo/CHEBI_33582> rdfs:label ?label_targetchebi .
  ?chebi_for_drug rdfs:subClassOf <http://purl.obolibrary.org/obo/CHEBI_33582> option (transitive) .
  ?d owl:onProperty <http://www.obofoundry.org/ro/ro.owl#has_proper_part>;
  owl:someValuesFrom ?chebi_for_drug .

  ?drug rdfs:subClassOf ?d .
  ?drug rdfs:label ?labeldrug .

  ?dae rdfs:subClassOf ?s1 .
  ?dae rdfs:subClassOf ?p .
  ?p a owl:Class .
  ?p rdfs:label ?labelp .

```

?s1 owl:onProperty obo:BFO\_0000057; owl:someValuesFrom ?drug .

FILTER REGEX(str(?p), "OAE") .

}

#part of results:

| callret-0                                                                                           | label_target<br>chebi               | chebi_for_drug                                                                                        | drug                                                                                                    | labeldrug                            | p                                                                                                   | labelp                         |
|-----------------------------------------------------------------------------------------------------|-------------------------------------|-------------------------------------------------------------------------------------------------------|---------------------------------------------------------------------------------------------------------|--------------------------------------|-----------------------------------------------------------------------------------------------------|--------------------------------|
| <a href="http://purl.obolibrary.org/obo/CHEBI_33582">http://purl.obolibrary.org/obo/CHEBI_33582</a> | carbon group<br>molecular<br>entity | <a href="http://purl.obolibrary.org/obo/CHEBI_63581">http://purl.obolibrary.org/obo/CHEBI_63581</a>   | <a href="http://purl.obolibrary.org/obo/DRON_00023447">http://purl.obolibrary.org/obo/DRON_00023447</a> | Stavudine<br>Oral<br>Capsule         | <a href="http://purl.obolibrary.org/obo/OAE_0000337">http://purl.obolibrary.org/obo/OAE_0000337</a> | peripheral<br>neuropathy<br>AE |
| <a href="http://purl.obolibrary.org/obo/CHEBI_33582">http://purl.obolibrary.org/obo/CHEBI_33582</a> | carbon group<br>molecular<br>entity | <a href="http://purl.obolibrary.org/obo/CHEBI_127780">http://purl.obolibrary.org/obo/CHEBI_127780</a> | <a href="http://purl.obolibrary.org/obo/DRON_00025587">http://purl.obolibrary.org/obo/DRON_00025587</a> | Foscarnet<br>Injectable<br>Solution  | <a href="http://purl.obolibrary.org/obo/OAE_0000418">http://purl.obolibrary.org/obo/OAE_0000418</a> | neuropathy<br>AE               |
| <a href="http://purl.obolibrary.org/obo/CHEBI_33582">http://purl.obolibrary.org/obo/CHEBI_33582</a> | carbon group<br>molecular<br>entity | <a href="http://purl.obolibrary.org/obo/CHEBI_44915">http://purl.obolibrary.org/obo/CHEBI_44915</a>   | <a href="http://purl.obolibrary.org/obo/DRON_00026059">http://purl.obolibrary.org/obo/DRON_00026059</a> | Propofol<br>Injectable<br>Suspension | <a href="http://purl.obolibrary.org/obo/OAE_0000418">http://purl.obolibrary.org/obo/OAE_0000418</a> | neuropathy<br>AE               |

**Notes:**

- Some drugs are not associated with AEs. For example, DRON\_00022253 -- Levodopa Oral Tablet are not associated with any AEs.
- Some drugs may have two AEs, for example, DRON\_00022291 - lomefloxacin Oral Tablet
